# Supplementary material for: Comparative virulence of three different strains of Burkholderia pseudomallei in an aerosol non-human primate model
Source: PubMed Central journal article supplement (PMC7904162; doi:10.1371/journal.pntd.0009125), 2021-02-11
Supplement: pntd.0009125.s009.pdf [file pntd.0009125.s009.pdf]

**S1 Table. Histopathologic findings in AGMs and RMs following inhalation of *B. pseudomallei* HBPUB10134a.**

|                                  | Prevalance       |     | Severity <sup>a</sup> : average (range) |           |
|----------------------------------|------------------|-----|-----------------------------------------|-----------|
|                                  | AGM              | RM  | AGM                                     | RM        |
| <b>Pneumonia</b>                 | 5/5              | 3/5 | 3.8 (3-5)                               | 3.3 (2-4) |
| <b>Pleuritis</b>                 | 4/5              | 2/5 | 3.7 (3-5)                               | 3 (2-4)   |
| <b>Pulmonary pyogranulomas</b>   | 0/5              | 1/5 | N/A                                     | 4 (4)     |
| <b>Hepatitis</b>                 | 5/5              | 3/5 | 2.4 (2-3)                               | 2 (2-3)   |
| <b>Splenitis</b>                 | 5/5              | 4/5 | 4.4 (3-4)                               | 2.5 (2-3) |
| <b>Lymphadenitis</b>             |                  |     |                                         |           |
| <b>Tracheobronchial</b>          | 3/4 <sup>b</sup> | 2/5 | 2.6 (2-3)                               | 2 (2)     |
| <b>Mediastinal</b>               | 4/5              | 1/5 | 3.2 (3-4)                               | 2 (2)     |
| <b>Nephritis</b>                 | 0/5              | 2/5 | N/A                                     | 1.5 (1-2) |
| <b>Myelitis (bone marrow)</b>    | 1/5              | 0/5 | 1 (1)                                   | N/A       |
| <b>Bone marrow pyogranulomas</b> | 4/5              | 0/5 | 2.5 (2-4)                               | N/A       |

<sup>a</sup>Severity scores: 1: minimal, 2: mild, 3: moderate, 4: marked, 5: severe.

<sup>b</sup>One tracheobronchial lymph node was not examined.
